# Supplementary material
Source: PubMed Central journal article supplement (PMC10798308)
Supplement: NIHPP2023.08.31.555634v2-supplement-1.pdf [file NIHPP2023.08.31.555634v2-supplement-1.pdf]

Figure 1 – Figure Supplement 1

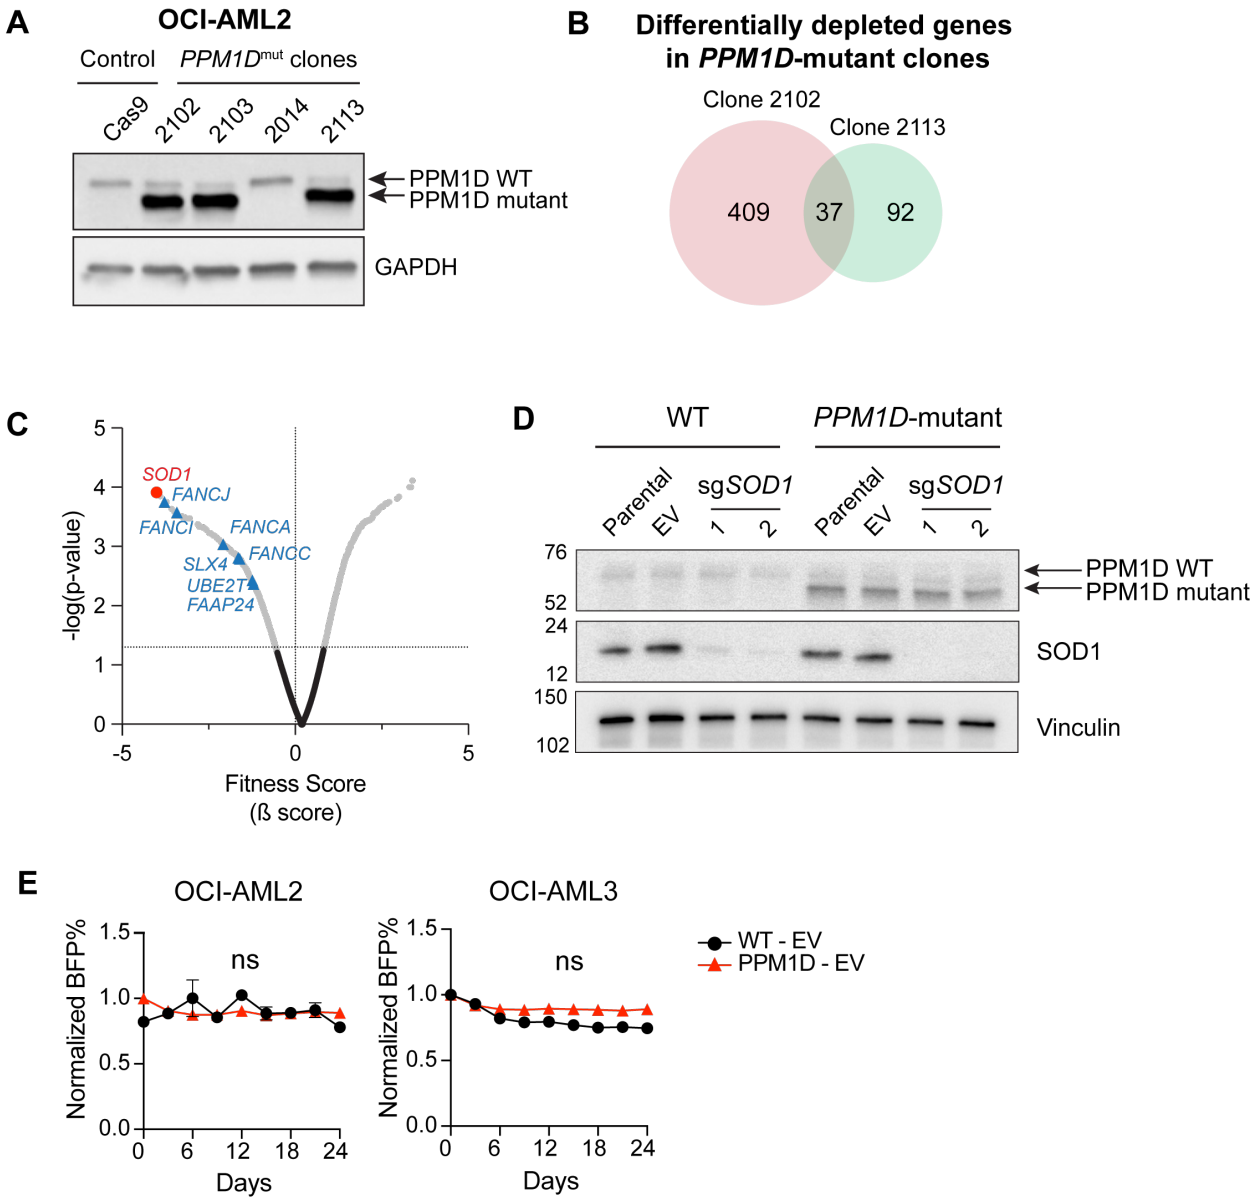

1140

**Figure 1 – Figure Supplement 1. *SOD1* is a synthetic lethal vulnerability of *PPM1D*-mutant leukemia cells.** (A) Immunoblot validation of *PPM1D*-mutant Cas9-expressing OCI-AML2 cells generated and used for CRISPR screening. Blots were probed with anti-PPM1D (1:1000) and GAPDH (1:1000). Clones 2102 and 2113 were selected for the dropout screen. (B) Venn diagram of genes that were depleted from the two *PPM1D*-mutant clones (#2102, 2113) used in the dropout screen, but not depleted in the WT control lines. 37 genes were found to be depleted in both mutant clones. For a full list of genes, see Figure 1–source data 1. (C) Volcano plot of synthetic lethal hits ranked by fitness score with the Fanconi Anemia pathway genes highlighted in blue. (D) Immunoblot validation of *SOD1*-deletion. WT and *PPM1D*-mutant Cas9-OCI-AML2 cells were transduced with control (EV) or sg*SOD1* lentiviruses. Two sgRNAs targeting *SOD1* were tested. Three days post-transduction, the cells underwent puromycin selection (3 ug/mL) for three days after which they were harvested for western blot. Blots were probed with anti-PPM1D (1:1000), anti-SOD1 (1:500), and anti-vinculin (1:2500). (E) Cas9-OCI-AML2 and Cas9-OCI-AML3 WT or *PPM1D*-mutant cells were transduced with the empty vector control backbone tagged with a blue fluorescent protein (BFP) reporter. Cells were assayed by flow cytometry between 3- and 24-days post-transduction and normalized to the BFP percentage at day 3. Data shown are mean  $\pm$  SD (n=2 per condition).

# Figure 2 – Figure Supplement 1

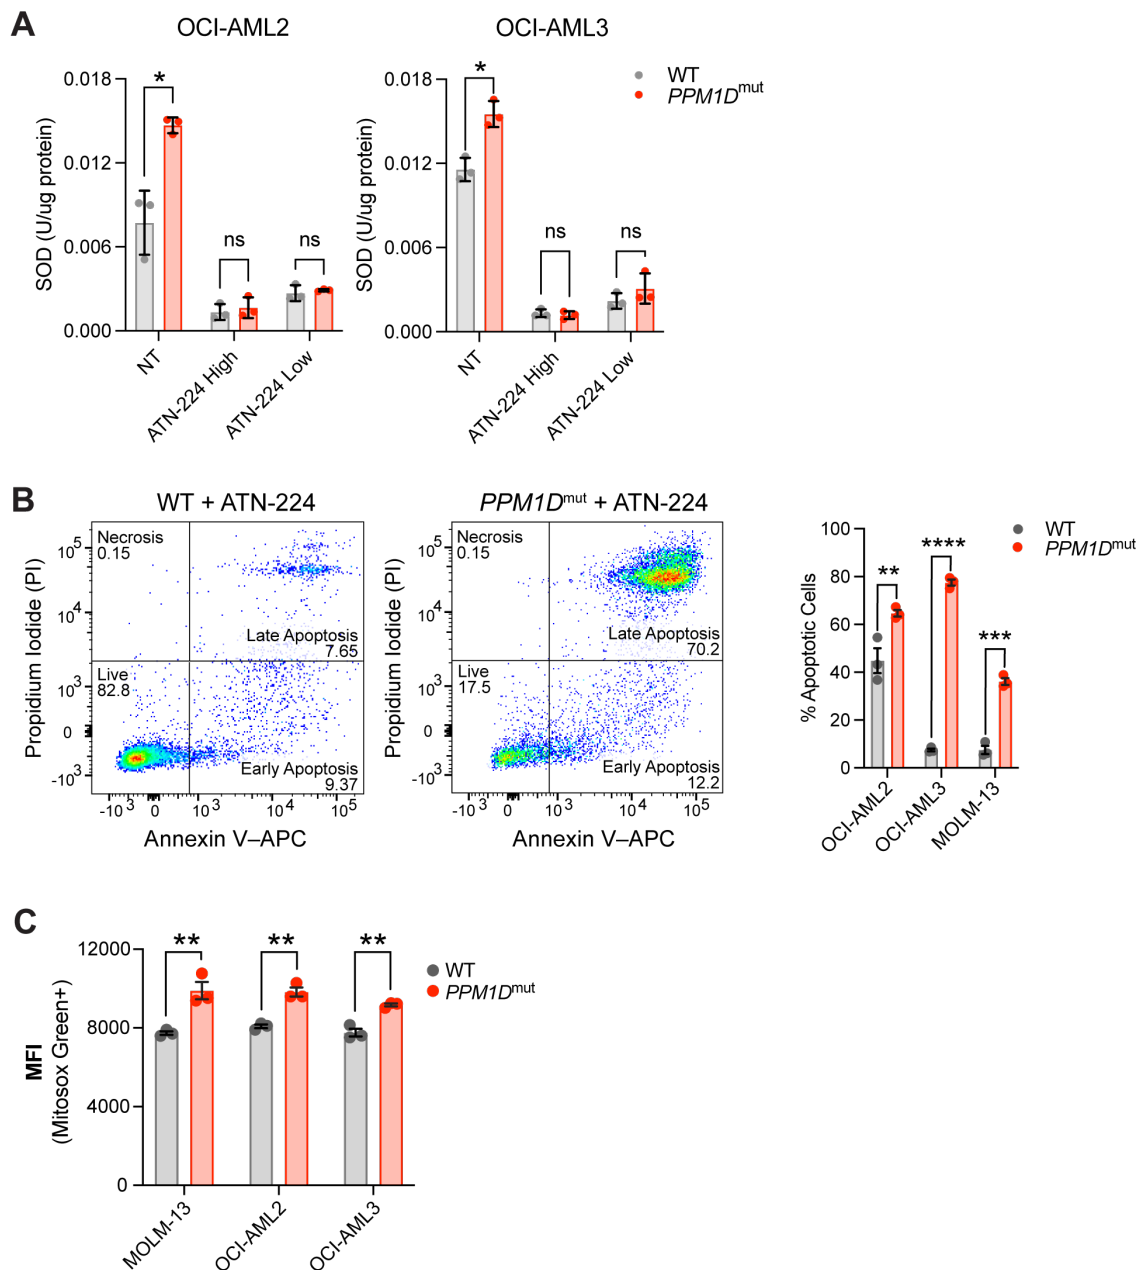

**Figure 2 – Figure Supplement 1. *PPM1D*-mutant cells have increased oxidative stress. (A)** SOD activity assays in OCI-AML2 and OCI-AML3 cells at baseline (NT), or treated with high (12.5 uM) or low (6.25 uM) doses of ATN-224 for 16 hours. **(B)** Left: Representative flow cytometry plots of WT and *PPM1D*-mutant cells treated with ATN-224 (25 uM for 24 hours) and stained for Annexin V-APC and PI for apoptosis; multiple unpaired t-tests, ns=non-significant, \* $p < 0.05$ , \*\* $p < 0.01$ , \*\*\* $p < 0.001$ , \*\*\*\* $p < 0.0001$ . **(C)** Endogenous mitochondrial superoxide levels of WT and *PPM1D*-mutant leukemia cell lines were measured using MitoSox Green staining (1 uM). The mean fluorescence intensity (MFI) of MitoSox Green was measured by flow cytometry. Mean  $\pm$  SD (n=3) is shown.

# Figure 2 – Figure Supplement 2

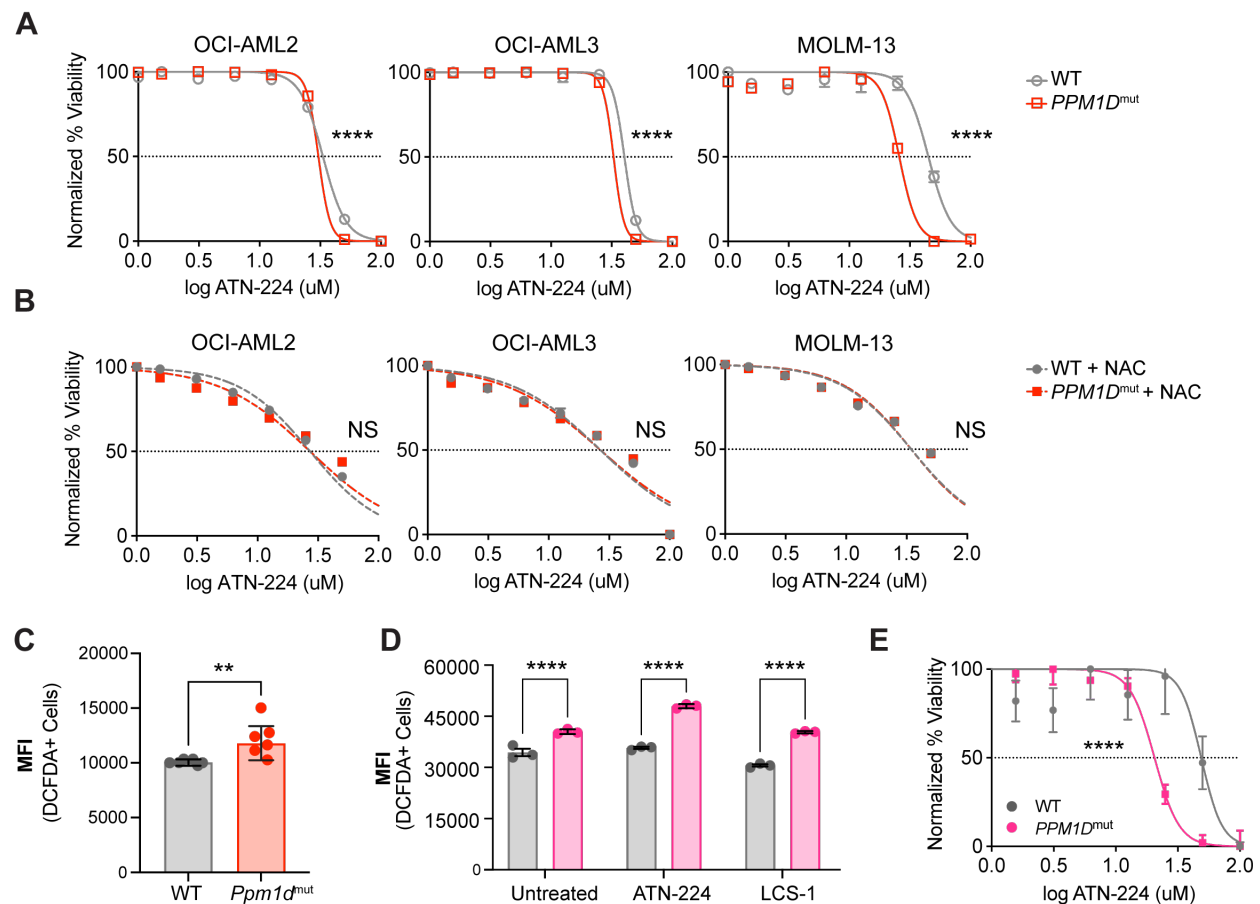

**Figure 2 – Figure Supplement 2. *PPM1D*-mutant cells have increased oxidative stress. (A-B)** Dose response curves for cell viability with SOD1-inhibitor (ATN-224) (A) or ATN-224 in combination with 0.25 uM NAC (B) in WT and *PPM1D*-mutant leukemia cell lines after 24-hours. Mean  $\pm$  SD (n=3) is shown along with a non-linear regression curve. All values are normalized to the baseline cell viability with vehicle, as measured by MTT assay. (C) Total reactive oxygen species (ROS) of WT and *Ppm1d*-mutant MEFs measured by DCFDA (10 uM) staining. Mean fluorescence intensity (MFI) was determined by flow cytometry. n=6 biological replicates were used for each genotype. Data shown are the mean of each biological replicate; unpaired t-test. (D) Total ROS of WT GM12878 (grey) and *PPM1D*-mutant (pink) patient lymphoblastic cell lines (LCLs) at baseline, and after 24-hrs of SOD1 inhibition measured by DCFDA (10 uM) staining. MFI was determined by flow cytometry; multiple unpaired t-tests, (E) Dose response curve of WT and *PPM1D*-mutant LCLs after ATN-224 treatment. IC50s of WT and *PPM1D*-mutant LCLs were 48.8 uM and 20.51 uM, respectively as measured by MTT assay; non-linear regression analysis, ns=non-significant (p>0.05), \*\*p<0.01, \*\*\*p<0.001, \*\*\*\*p<0.0001.

# Figure 3 – Figure Supplement 1

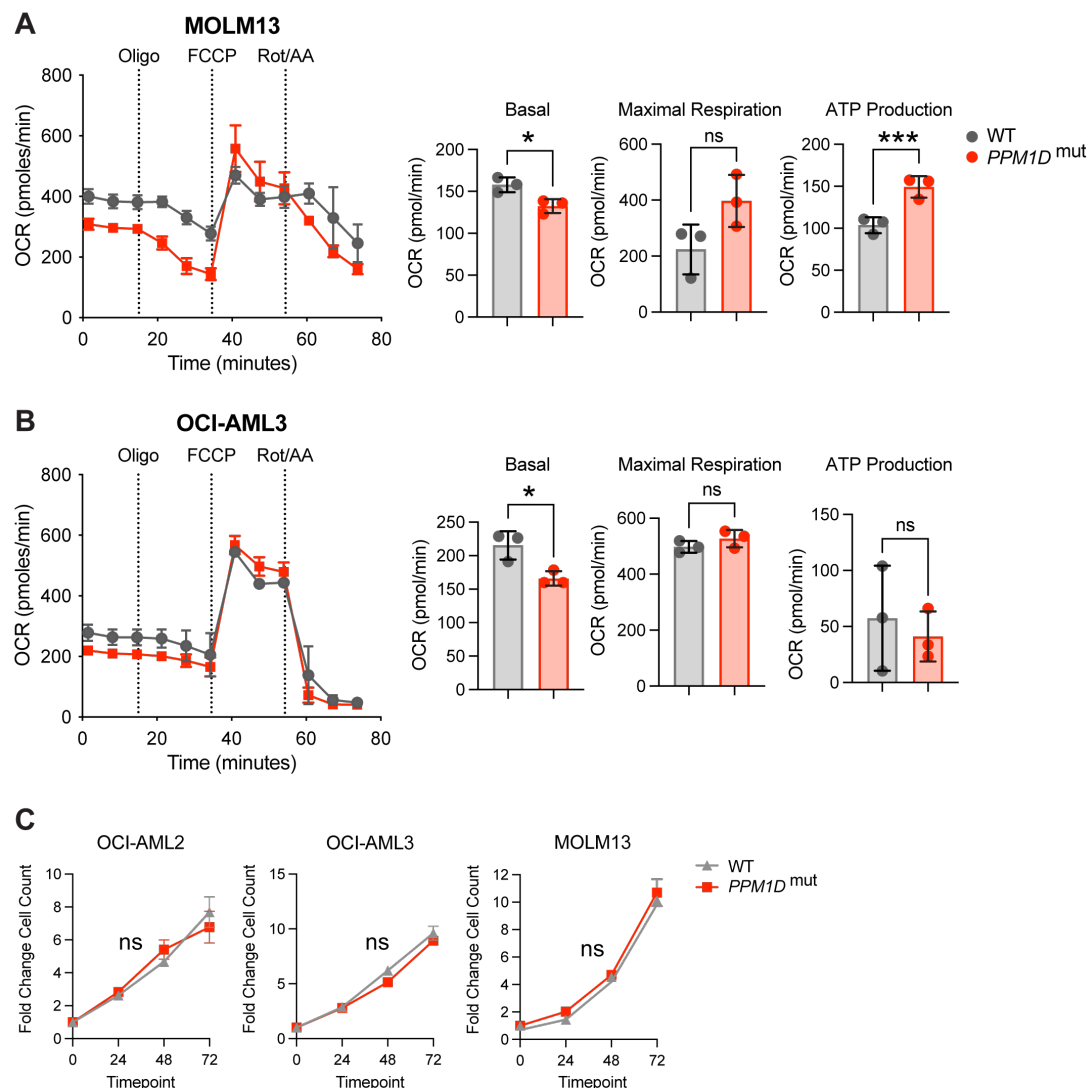

**Figure 3 – Figure Supplement 1. *PPM1D*-mutant cells have altered mitochondrial function.** (A,B) Measurement of mitochondrial oxygen consumption rate (OCR) by seahorse assay in WT vs. *PPM1D*-mutant MOLM-13 (A) and OCI-AML3 (B) cells after treatment with oligomycin (1.5  $\mu$ M), FCCP (0.5  $\mu$ M), and rot/AA (0.5  $\mu$ M). Quantification of basal, maximal, and ATP-linked respiration shown. Each cell line was performed in technical triplicates, student's t-test. (C) Growth curves of WT and *PPM1D*-mutant leukemia cell lines at 24-, 48-, and 72-hours. Cell counts were normalized to day 0. ns=non-significant ( $p>0.05$ ), \* $p<0.05$ , \*\*\* $p<0.001$ .

Figure 4 – Figure supplement 1

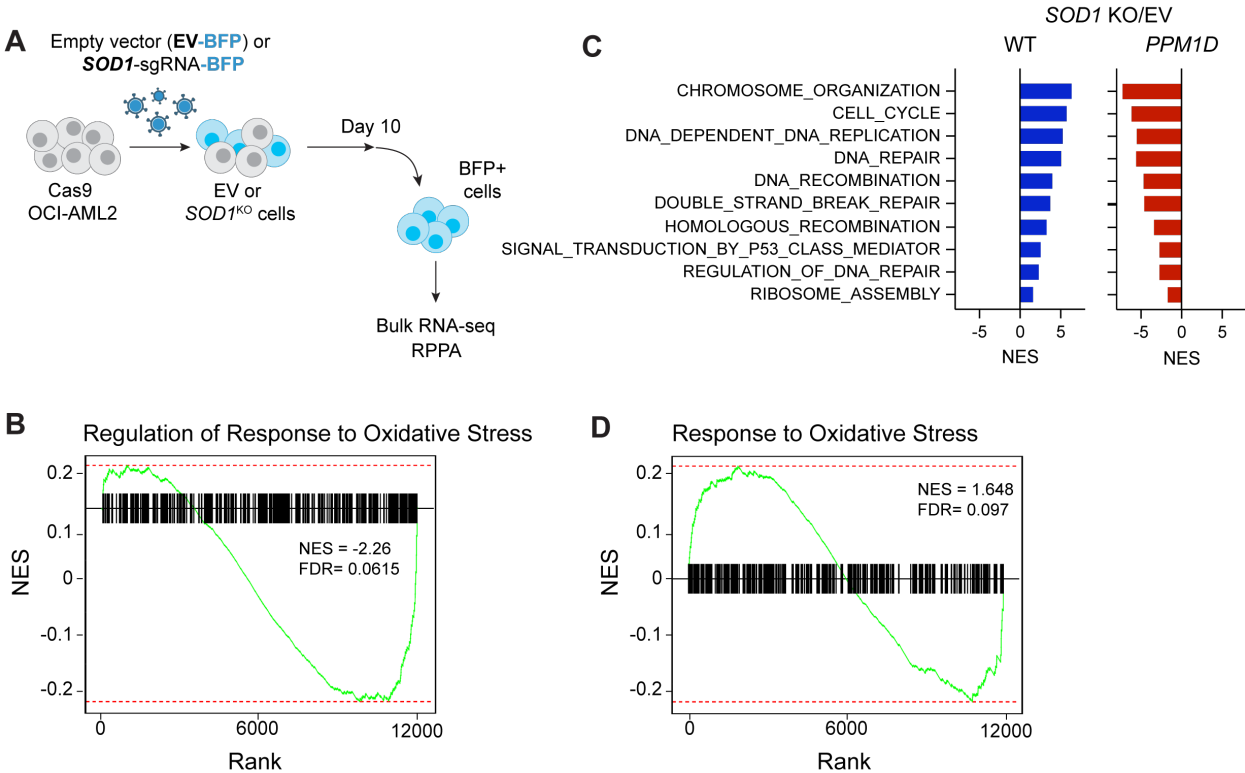

**Figure 4 – Figure Supplement 1. *PPM1D*-mutant cells have reduced oxidative stress response.** (A) Schematic of the experimental setup for the bulk RNA-sequencing and reverse-phase protein array. WT and *PPM1D*-mutant Cas9 OCI-AML2 cells were transduced with either empty vector (EV)-BFP or *SOD1*-sgRNA-BFP. Cells were passaged for ten days and then sorted for BFP expression for downstream analysis. (B, D) GSEA enrichment plots for *PPM1D*-mutant cells compared to WT after transduction with EV (B) or after *SOD1*-knockout (D) for the “Regulation of Response to Oxidative Stress” (GO:1902882) and “Response to Oxidative Stress” (GO:0006979). NES are shown with FDR<0.25. (C) GSEA analysis of RNA-sequencing of *SOD1*-deleted cells compared to EV control in WT and *PPM1D*-mutant cells. Blue and red bars indicate significantly up- and downregulated pathways, respectively. Normalized enrichment scores (NES) are indicated. All pathways filtered for FDR<0.25.

Figure 4 – Figure supplement 2

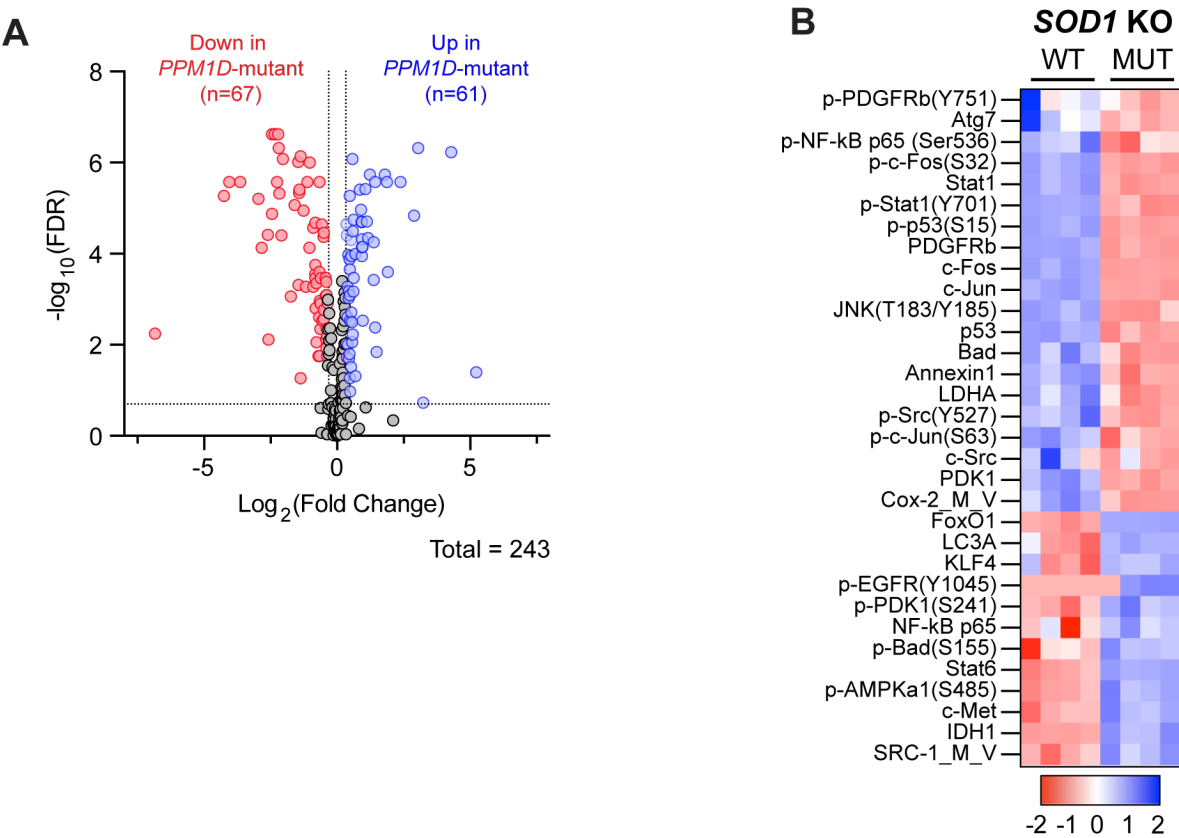

**Figure 4 – Figure Supplement 2. *PPM1D*-mutant cells have reduced oxidative stress response. (A)** Volcano plot of the differentially expressed proteins from the RPPA in *PPM1D*-mutant OCI-AML2 cells compared to WT. Red and blue dots indicate significantly up- or downregulated proteins, respectively, with a cutoff FDR<0.2 and linear fold change >|1.2|. **(B)** RPPA profiling of WT and *PPM1D*-mutant cells after *SOD1* deletion. Proteins from the “Response to Oxidative Stress” pathway have been selected for the heatmap. Each column represents a technical replicate. See Figure 4-source data 2 for the raw data.

**Figure 5 – Figure supplement 1**

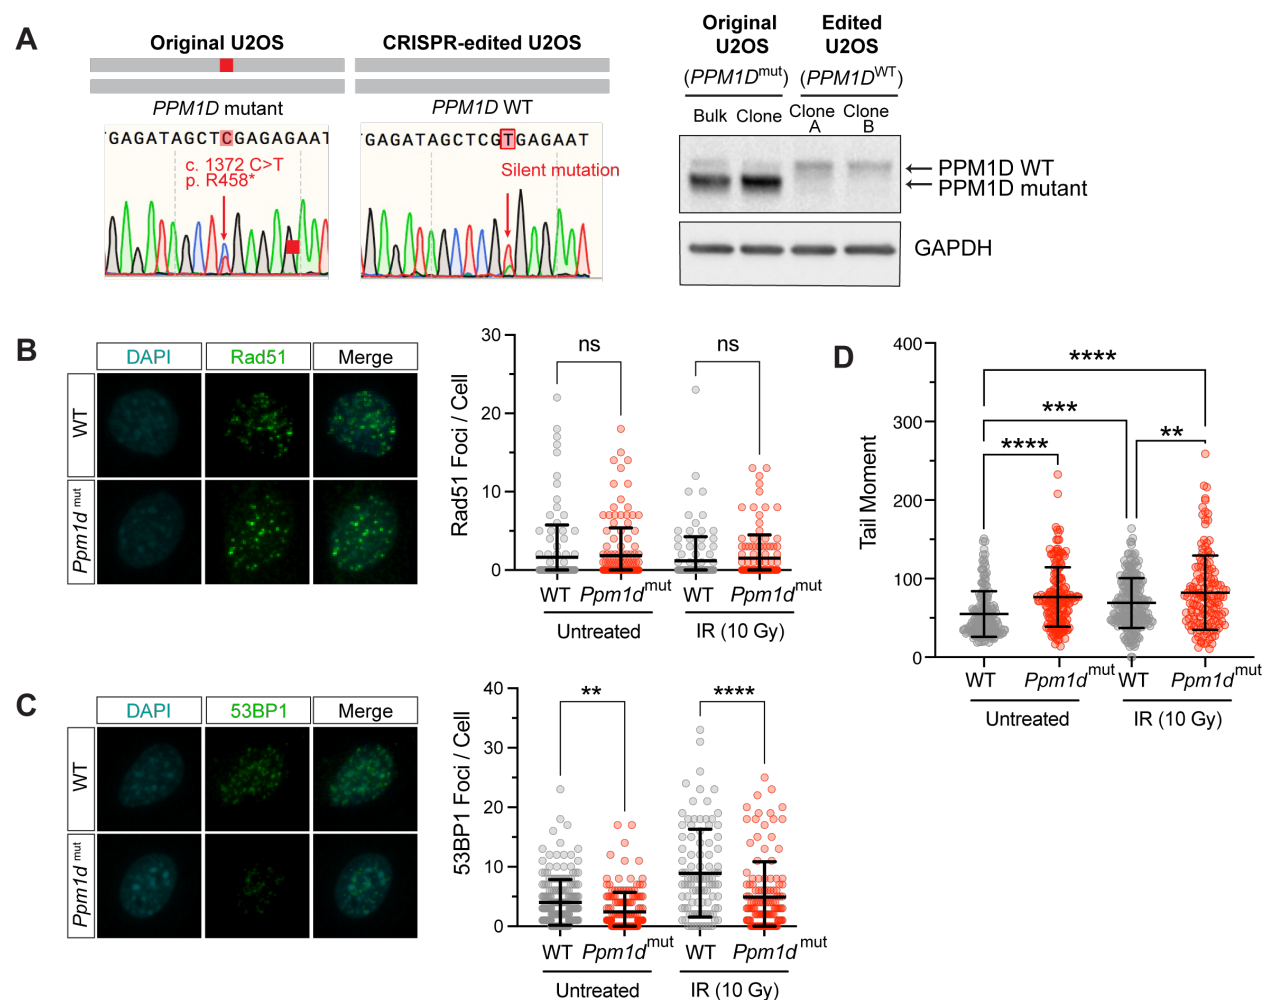

**Supplementary Figure 5. *PPM1D*-mutations increase genomic instability and impairs non-homologous end-joining repair.** (A) Left: Sanger sequencing traces of the parental U2OS cell line harboring a c.1372 C>T mutation in *PPM1D* and the CRISPR-edited U2OS cell line with mutation corrected to WT *PPM1D*. Right: Immunoblot validation of these clones are shown. Lysates were probe with anti-*PPM1D* (1:1000) and anti-GAPDH (1:1000). (B,C) Left: Representative images of Rad51 and 53BP1 immunofluorescence microscopy. Mouse embryonic fibroblasts were treated with 10 Gy irradiation, harvested 1-hour post-irradiation and stained for the indicated markers. Right: Quantification of the number of foci per cell is shown. Analysis was performed using CellProfiler. n>100 cells for each condition; students t-test. (D) Comet assay quantification of mouse embryonic fibroblasts at baseline and after 1-hour post-irradiation (10 Gy). Quantification and analyses of tail moments were performed using the Comet IV software. n≥150 comets were scored per experimental group; 2way ANOVA, ns=non-significant (p>0.05), \*p<0.05, \*\*p<0.01, \*\*\*p<0.001, \*\*\*\*p<0.0001.
